# Supplementary material for: Synthesis of a smart Janus-like supramolecular polymer based on the host–guest chemistry and its self-assembly
Source: Royal Society of Chemistry journal article supplement (doi:10.1039/c5ta03937a), 2015-01-01
Supplement: c5ta03937a1.pdf [file c5ta03937a1.pdf]

Electronic supplementary information (ESI)

## Based on the host-guest chemistry to build smart Janus-like supramolecular polymer and Its Self-Assembly

Long Yang, Yinzhou Guo, Zhongli Lei \*

Key Laboratory of Applied Surface and Colloid Chemistry, Ministry of Education, Shaanxi Normal University,  
Xi'an, 710062, China E-mail address: zhlllei2013@163.com Tel: +86 029 81530812; fax: +86 29 85307774

**TABLE S1.** GPC Characterization Result of Prepared polymer Chains

| Sample                            | Mn    | PDI  |
|-----------------------------------|-------|------|
| $\beta$ -CD-(NIPAAm) <sub>4</sub> | 5623  | 1.27 |
| Ad-PtBMA                          | 6825  | 1.19 |
| alkyne-(PtBMA-Br) <sub>2</sub>    | 13953 | 1.23 |
| Ad-(PtBMA) <sub>3</sub>           | 20578 | 1.21 |
| Ad-(PtBMA) <sub>7</sub>           | 48084 | 1.34 |

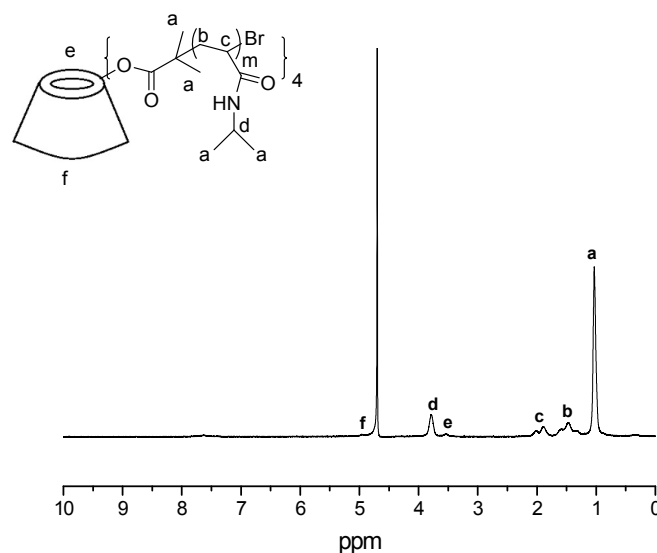

Figure S1 The <sup>1</sup>H NMR spectrum of  $\beta$ -CD-(PNIPAAm)<sub>4</sub>(D<sub>2</sub>O, 400 MHz, 25 °C)

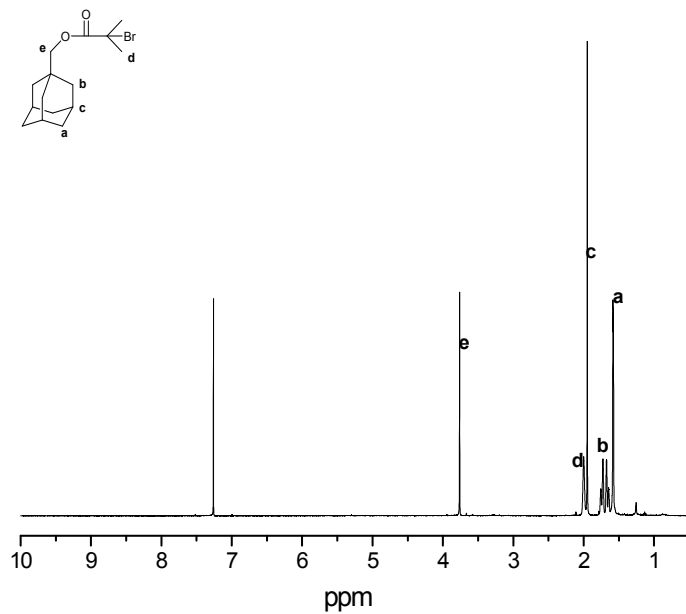

Figure S2 The <sup>1</sup>H NMR spectrum of Ad-Br (CD<sub>3</sub>Cl, 400 MHz, 25 °C)

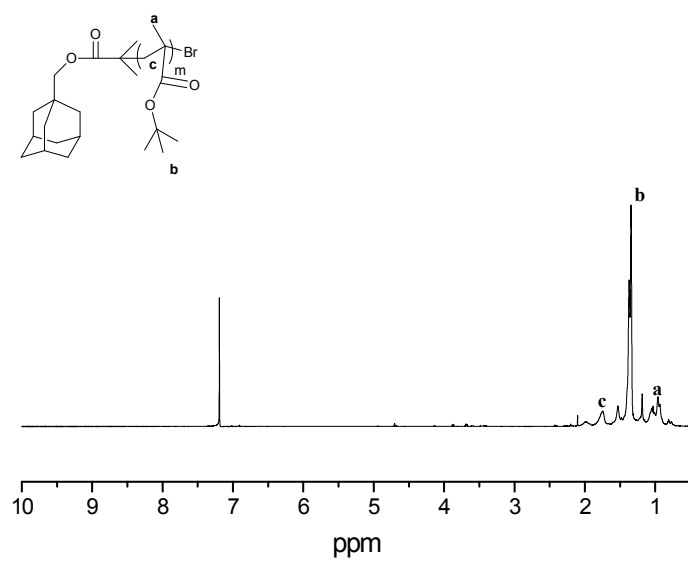

Figure S3 The <sup>1</sup>H NMR spectrum of Ad-PtBMA-Br (CD<sub>3</sub>Cl, 400 MHz, 25 °C)

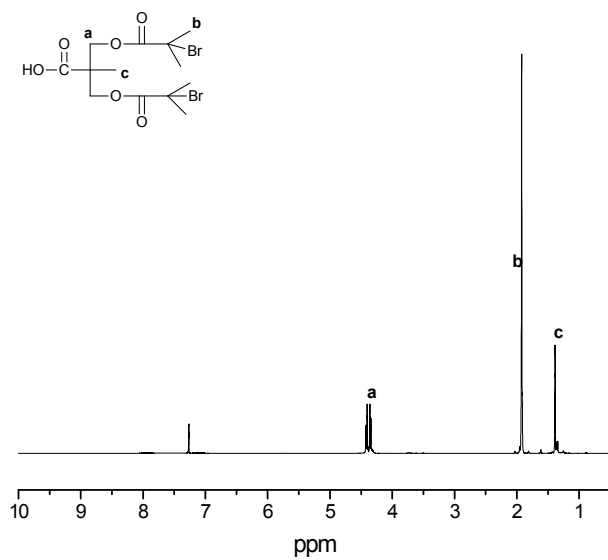

Figure S4 The  $^1\text{H}$  NMR spectrum of product BPA ( $\text{CD}_3\text{Cl}$ , 400 MHz, 25 °C)

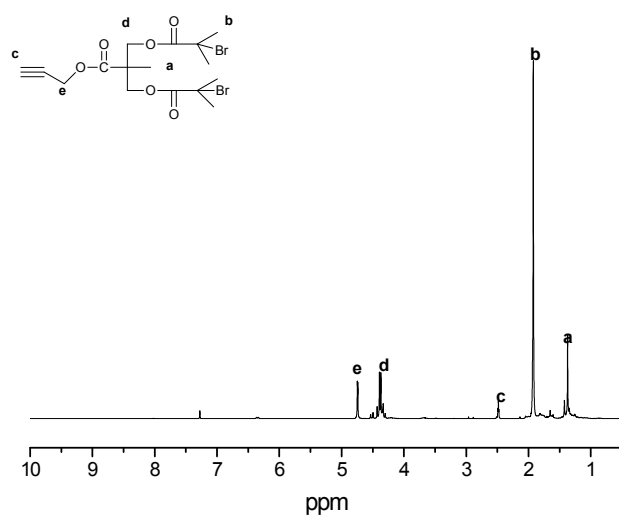

Figure S5 The  $^1\text{H}$  NMR spectrum of PBMP ( $\text{CD}_3\text{Cl}$ , 400 MHz, 25 °C)

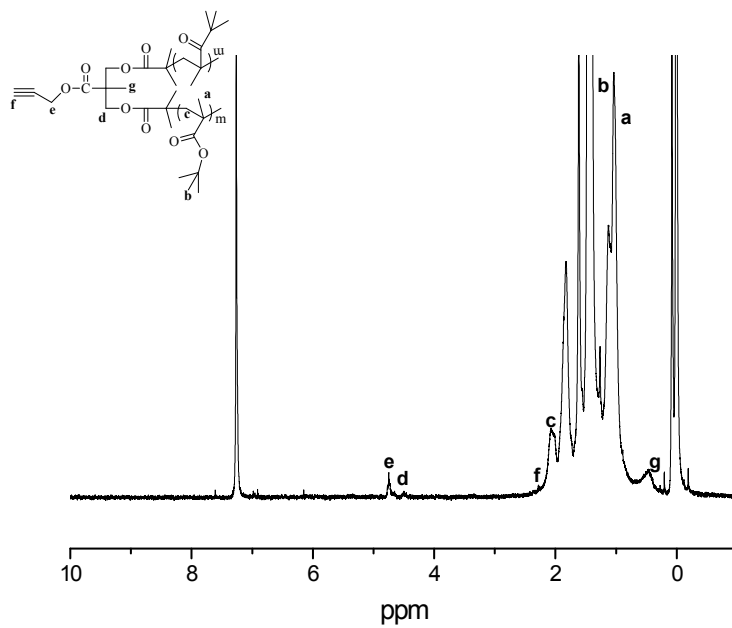

Figure S6 The <sup>1</sup>H NMR spectrum of alkyne-(PtBMA-Br)<sub>2</sub> (CD<sub>3</sub>Cl, 400 MHz, 25 °C)

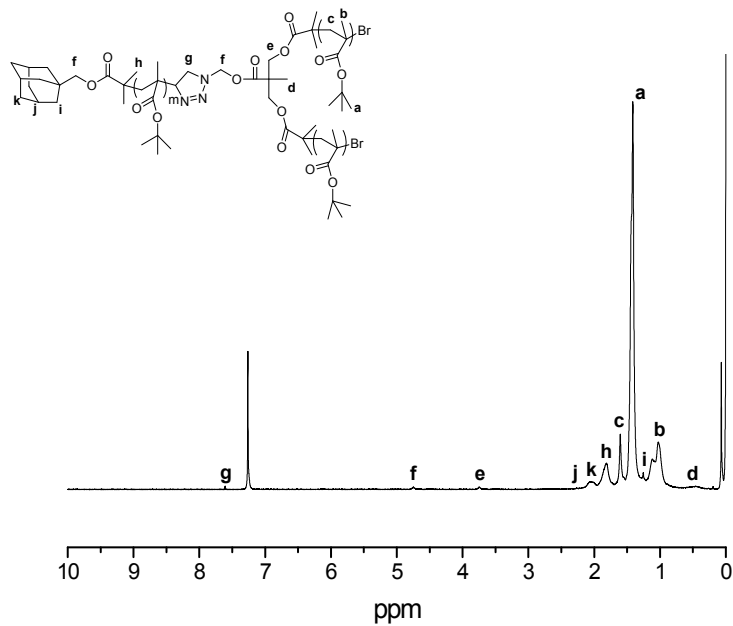

Figure S7 The <sup>1</sup>H NMR spectrum of Ad-(PtBMA)<sub>3</sub> (CD<sub>3</sub>Cl, 400 MHz, 25 °C)

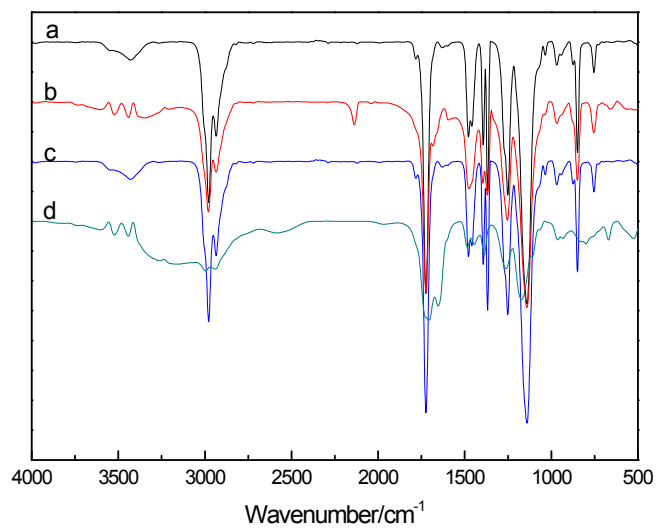

Figure S8 The IR spectrum of polymer

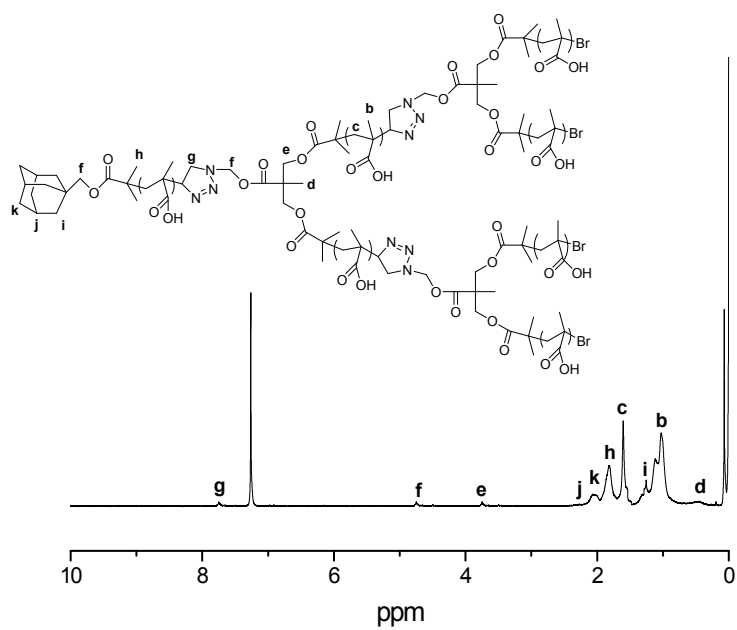

Figure S9 The <sup>1</sup>H NMR spectrum of product Ad-(PMAA)<sub>7</sub> (CD<sub>3</sub>Cl, 400 MHz, 25 °C)
